# Supplementary material
Source: publisher figshare collection journal article supplement (https://springernature.figshare.com/ndownloader/files/13298486)
Supplement: Supplementary file [file 13298486]

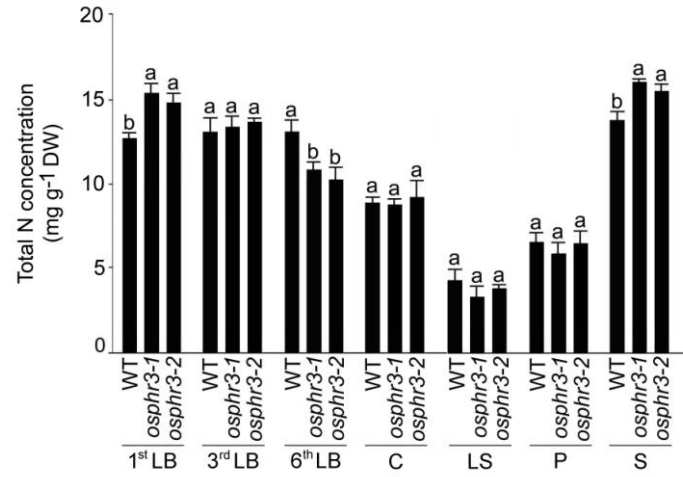

**Fig. S4** Mutation in *OsPHR3* differentially affects total N concentration in different tissues. Seeds of the WT and the mutants (*osphr3-1* and *3-2*) were grown in a pot soil for 13 weeks (grain-harvest stage). Total N concentration was assayed in 1<sup>st</sup>, 3<sup>rd</sup> and 6<sup>th</sup> leaf blade (LB), culm (C), leaf sheath (LS), panicle (P) and seed (S) of the WT and the mutants (*osphr3-1* and *3-2*). The order of leaf blades is from top to bottom. Values are means  $\pm$ SE ( $n = 5$ ) and different letters on the histograms indicate that the values differ significantly ( $P < 0.05$ , one-way ANOVA).
